# Supplementary material
Source: PubMed Central journal article supplement (PMC3344975)
Supplement: 1118678109_pnas.1118678109_SI.pdf [file 1118678109_pnas.1118678109_SI.pdf]

# Supporting Information

Beh et al. 10.1073/pnas.1118678109

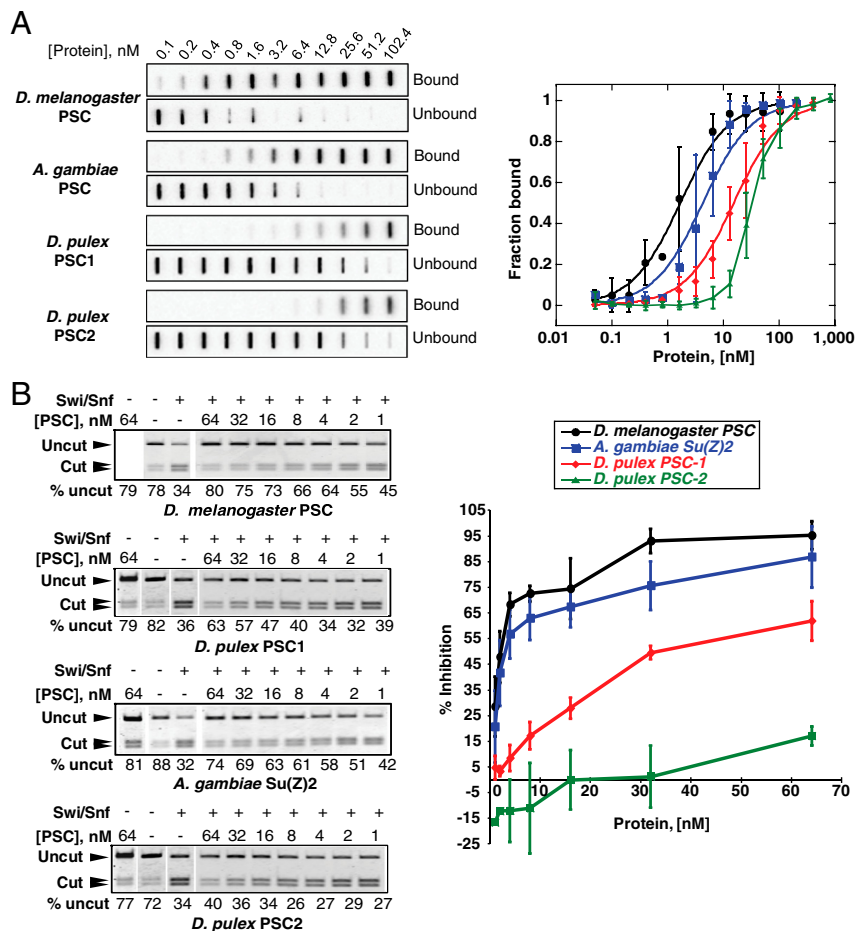

**Fig. S1.** Metazoan PSC-CTRs exhibit measurable variation in biochemical activities. (A) Left panel: representative data from double-filter binding assays that measure the  $K_d$  of PSC-CTRs for free DNA. PSC-CTR protein was titrated into binding reactions containing 20pM 157-bp  $^{32}$ P-labeled DNA. Protein-DNA complexes are captured on the top (nitrocellulose) filter, while unbound DNA is captured on the bottom (charged nylon) filter. (Right) data from four different PSC-CTRs are graphed. Error bars denote standard deviation. (B) (Left) representative data from Restriction Enzyme Accessibility (REA) assays that measure the ability of PSC-CTRs to inhibit chromatin remodeling. The extent of Swi/Snf inhibition (labeled as “% inhibition”) was calculated from:  $[(\text{percent uncut with Swi/Snf and PSC-CTR}) - (\text{percent uncut without Swi/Snf}) - (\text{percent uncut with Swi/Snf})] \times 100\%$ . (Right) representative data from four different PSC-CTRs are graphed. Error bars denote standard deviation.









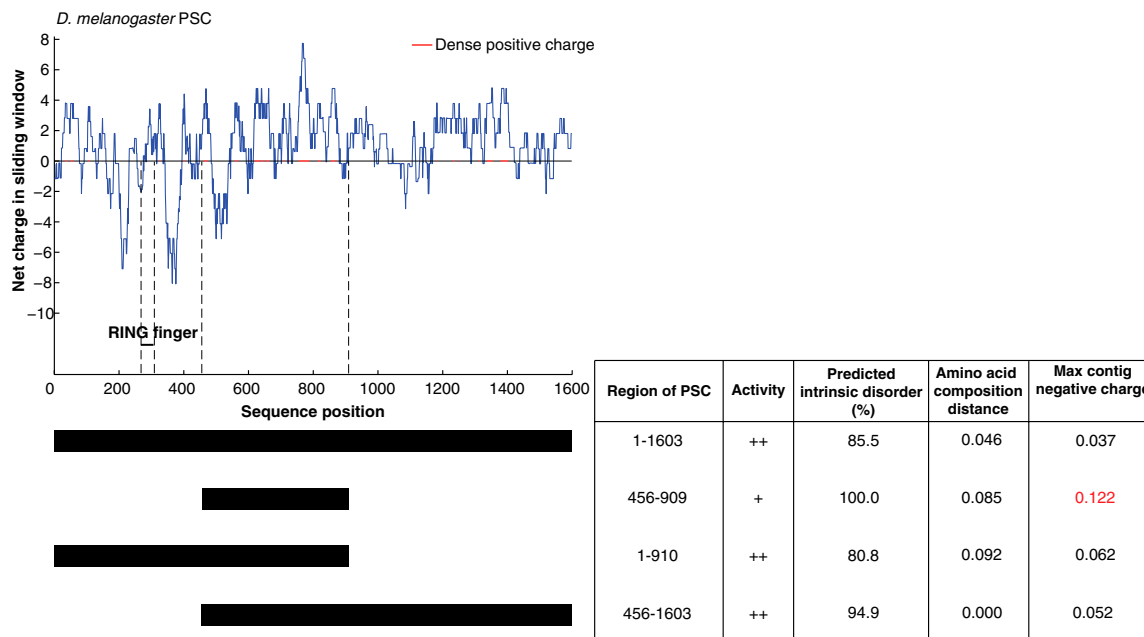

**Fig. S8.** Sequence analysis of *D. melanogaster* PSC subdomains. Charge plot of *D. melanogaster* PSC, with red horizontal lines denoting dense stretches of positive charge (defined as regions with charge greater than +3.5). Charge plots were generated from consecutive 25-amino acid sliding windows. Black horizontal line denotes the RING finger, while black horizontal bars denote various PSC regions that were previously characterized experimentally (1). "Activity" of each region was based on their ability to bind chromatin and inhibit chromatin remodeling, as previously reported (1). The metrics "Predicted intrinsic disorder," "Amino acid composition distance," and "Max contig negative charge" are computed as described in the "Criteria for prediction of repressive activity" subsection in *Materials and Methods*. The maximum contiguous negative charge value of *D. melanogaster* PSC 456–909 is highlighted in red to indicate that it is greater than that of other subdomains, and is closer to (although still below) the threshold of 0.15 for classification of a PSC-CTR as non-repressive.

1 Lo SM, Francis NJ (2010) Inhibition of chromatin remodeling by polycomb group protein posterior sex combs is mechanistically distinct from nucleosome binding. *Biochemistry* 49:9438–9448.

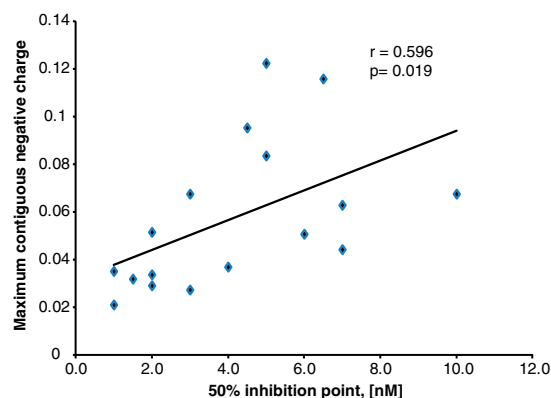

**Fig. S9.** Maximum contiguous negative charge is inversely correlated with repressive activity. The maximum contiguous negative charge (calculated as described in *Materials and Methods*) for each PSC-CTR was plotted against its 50% inhibition point. A significant correlation between maximum contiguous negative charge and 50% inhibition points is observed, indicating that PSC-CTRs with higher maximum contiguous negative charge tend to have lower repressive activity.



**Table S1. Annotated PSC-CTR sequences from metazoan and plant genomes. (A) All PSC-CTRs are listed, with their respective lengths, maximum contiguous negative charge, and amino acid composition distance (defined as the square root of the sum of the squared distances for each amino acid from *D. melanogaster* PSC-CTR.). (B) Filtered (predicted repressive) PSC-CTRs are listed, with their respective length, maximum contiguous negative charge, amino acid composition distance, and predicted extent of structural disorder. Detailed prediction criteria are described in *Materials and Methods*. [Table S1 \(XLSX\)](#)**

**Table S2. Tissue sources, protein and primer sequences and accession numbers. (A) Tissue samples and cell lines used for nucleic acid isolation and subsequent PCR amplification of PSC, Jing, and EMF1 genes. (B) Sequences of experimentally tested proteins and the Homology Region (HR) of *D. melanogaster* PSC. Strain-specific sequence polymorphisms may be present in the cloned sequences. There is a slight overlap in sequence between *D. melanogaster* PSC-HR used for TBLASTN searches, and *D. melanogaster* PSC-CTR purified in this study. This PSC-CTR sequence is two amino acids shorter than that previously used (1–3). The database accession number for EMF1 (AcoGoldSmith\_v1.000332m) corresponds to that *Aquilegia coerulea* EMF1, a very closely related species to *Aquilegia vulgaris*). Note that the *D. melanogaster* HR was not cloned; rather, it was used in BLAST searches to query for PSC homologues. (C) Primers used for amplification of PSC-CTR, Jing, and EMF1 genes. [Table S2 \(XLSX\)](#)**

- 1 Lo SM, Francis NJ (2010) Inhibition of chromatin remodeling by polycomb group protein posterior sex combs is mechanistically distinct from nucleosome binding. *Biochemistry* 49:9438–9448.
- 2 Francis NJ, Kingston RE, Woodcock CL (2004) Chromatin compaction by a polycomb group protein complex. *Science* 306:1574–1577.
- 3 King IF, et al. (2005) Analysis of a polycomb group protein defines regions that link repressive activity on nucleosomal templates to in vivo function. *Mol Cell Biol* 25:6578–6591.
